# Supplementary material for: Multi-omics analyses identify HSD17B4 methylation-silencing as a predictive and response marker of HER2-positive breast cancer to HER2-directed therapy
Source: PubMed Central journal article supplement (PMC7511952; doi:10.1038/s41598-020-72661-9), 2020-09-23
Supplement: 41598_2020_72661_MOESM1_ESM.pdf [file 41598_2020_72661_MOESM1_ESM.pdf]

## **Supplementary Information**

### **Multi-omics analyses identify *HSD17B4* methylation-silencing as a predictive and response marker of HER2-positive breast cancer to HER2-directed therapy**

Satoshi Yamashita, Naoko Hattori, Satoshi Fujii, Takeshi Yamaguchi, Masato Takahashi, Yasuo Hozumi, Takahiro Kogawa, Omar El-Omar, Yu-Yu Liu, Nobuaki Arai, Akiko Mori, Hiroko Higashimoto, Toshikazu Ushijima\*, and Hirofumi Mukai

\*Correspondence to Toshikazu Ushijima, Division of Epigenomics, National Cancer Center Research Institute, Tokyo, Japan, 5-1-1 Tsukiji, Chuo-ku, Tokyo 104-0045, Japan; phone: +81 3 3547 5240, fax: +81 3 5565 1753, E-mail: tushijim@ncc.go.jp

Supplementary Table 1 List of samples

| Sample ID | Age | Group        | Usage for previous study (Fuji et al. 2017) | Pathological response | Genomic screening | Transcriptome screening | Epigenome screening | Analysed samples during the treatment | Clinical tumor stage         |                      | Clinical nodal stage |                | Clinical stage 2/IA                 |    | Histology 1-invasive ductal carcinoma |            | Treatment (2 course) | 1-wPTx1m ER | PgR | Chemotherapy effect                                                                         |   |  |
|-----------|-----|--------------|---------------------------------------------|-----------------------|-------------------|-------------------------|---------------------|---------------------------------------|------------------------------|----------------------|----------------------|----------------|-------------------------------------|----|---------------------------------------|------------|----------------------|-------------|-----|---------------------------------------------------------------------------------------------|---|--|
|           |     |              |                                             |                       |                   |                         |                     |                                       | 1-T1<br>2-T2<br>3-T3<br>4-T4 | 1-N1<br>2-N2<br>3-N3 | 3-IB<br>4-IB         | 4-1IA<br>5-1IB | 1-invasive<br>2-invasive<br>3-Other | ab | 2-EX+1mab                             | 2-Negative |                      |             |     | 1-Grade0<br>2-Grade1a<br>3-Grade1b<br>4-Grade2a<br>5-Grade2b<br>6-Grade3 (DCIS)<br>7-Grade3 |   |  |
| 1-7C      | 47  | Screening    | Validation                                  | 0                     | ✓                 | ✓                       | ✓                   |                                       | 3                            | 2                    | 4                    | 1              | 2                                   | 1  | 1                                     |            |                      |             |     | 3                                                                                           |   |  |
| 11-40C    | 71  | Screening    | Validation                                  | 0                     | ✓                 | ✓                       | ✓                   |                                       | 2                            | 1                    | 2                    | 1              | 2                                   | 1  | 2                                     |            |                      |             |     | 2                                                                                           |   |  |
| 11-41C    | 60  | Screening    | Validation                                  | 0                     | ✓                 | ✓                       | ✓                   |                                       | 2                            | 1                    | 2                    | 1              | 2                                   | 1  | 1                                     | 1          | 1                    | 1           | 1   | 2                                                                                           |   |  |
| 11-45C    | 52  | Screening    | Validation                                  | 0                     | ✓                 | ✓                       | ✓                   |                                       | 2                            | 1                    | 2                    | 1              | 2                                   | 1  | 1                                     | 1          | 1                    | 1           | 1   | 2                                                                                           |   |  |
| 12-122C   | 36  | Screening    | Validation                                  | 0                     | ✓                 | ✓                       | ✓                   |                                       | 2                            | 2                    | 3                    | 1              | 2                                   | 1  | 1                                     | 2          | 2                    | 2           | 2   | 6                                                                                           |   |  |
| 2-46C     | 70  | Screening    | 0                                           | ✓                     | ✓                 | ✓                       | ✓                   |                                       | 4                            | 3                    | 5                    | 1              | 2                                   | 2  | 2                                     | 2          | 2                    | 2           | 2   | 2                                                                                           |   |  |
| 3-13C     | 61  | Screening    | Screening                                   | 0                     | ✓                 | ✓                       | ✓                   |                                       | 4                            | 4                    | 6                    | 1              | 1                                   | 1  | 1                                     | 2          | 2                    | 4           | 4   | 4                                                                                           |   |  |
| 3-38C     | 54  | Screening    | Validation                                  | 0                     | ✓                 | ✓                       | ✓                   |                                       | 2                            | 1                    | 2                    | 1              | 2                                   | 2  | 2                                     | 2          | 2                    | 5           | 5   | 5                                                                                           |   |  |
| 4-27C     | 61  | Screening    | Validation                                  | 0                     | ✓                 | ✓                       | ✓                   |                                       | 2                            | 1                    | 2                    | 1              | 1                                   | 1  | 1                                     | 1          | 1                    | 3           | 1   | 3                                                                                           |   |  |
| 5-49C     | 29  | Screening    | Validation                                  | 0                     | ✓                 | ✓                       | ✓                   |                                       | 2                            | 1                    | 2                    | 1              | 2                                   | 1  | 1                                     | 1          | 1                    | 1           | 1   | 2                                                                                           |   |  |
| 5-54C     | 68  | Screening    | Validation                                  | 0                     | ✓                 | ✓                       | ✓                   |                                       | 2                            | 1                    | 2                    | 1              | 2                                   | 1  | 2                                     | 1          | 1                    | 1           | 3   | 3                                                                                           |   |  |
| 5-6C      | 58  | Screening    | Screening                                   | 0                     | ✓                 | ✓                       | ✓                   |                                       | 1                            | 2                    | 2                    | 1              | 2                                   | 2  | 2                                     | 2          | 2                    | 4           | 4   | 4                                                                                           |   |  |
| 6-25C     | 39  | Screening    | Screening                                   | 0                     | ✓                 | ✓                       | ✓                   |                                       | 2                            | 2                    | 3                    | 1              | 1                                   | 1  | 1                                     | 1          | 1                    | 1           | 3   | 3                                                                                           |   |  |
| 6-39C     | 63  | Screening    | Validation                                  | 0                     | ✓                 | ✓                       | ✓                   |                                       | 2                            | 2                    | 3                    | 1              | 1                                   | 1  | 1                                     | 1          | 1                    | 1           | 2   | 2                                                                                           |   |  |
| 7-13C     | 84  | Screening    | Validation                                  | 0                     | ✓                 | ✓                       | ✓                   |                                       | 1                            | 2                    | 2                    | 1              | 2                                   | 1  | 1                                     | 1          | 1                    | 1           | 1   | 2                                                                                           |   |  |
| 8-19C     | 39  | Screening    | Screening                                   | 0                     | ✓                 | ✓                       | ✓                   |                                       | 3                            | 2                    | 4                    | 1              | 2                                   | 2  | 1                                     | 1          | 1                    | 1           | 5   | 5                                                                                           |   |  |
| 8-22C     | 66  | Screening    | Screening                                   | 0                     | ✓                 | ✓                       | ✓                   |                                       | 2                            | 3                    | 4                    | 1              | 2                                   | 1  | 2                                     | 1          | 2                    | 6           | 6   | 6                                                                                           |   |  |
| 8-44C     | 51  | Screening    | Validation                                  | 0                     | ✓                 | ✓                       | ✓                   |                                       | 1                            | 2                    | 1                    | 2              | 1                                   | 1  | 1                                     | 1          | 1                    | 2           | 6   | 6                                                                                           |   |  |
| 8-50C     | 42  | Screening    | Validation                                  | 0                     | ✓                 | ✓                       | ✓                   |                                       | 1                            | 2                    | 2                    | 1              | 1                                   | 1  | 1                                     | 1          | 1                    | 1           | 2   | 2                                                                                           |   |  |
| 9-43C     | 54  | Screening    | Validation                                  | 0                     | ✓                 | ✓                       | ✓                   |                                       | 3                            | 3                    | 4                    | 1              | 2                                   | 2  | 2                                     | 2          | 2                    | 3           | 3   | 3                                                                                           |   |  |
| 1-14C     | 59  | Screening    | 1                                           | ✓                     | ✓                 | ✓                       | ✓                   |                                       | 2                            | 2                    | 3                    | 1              | 1                                   | 2  | 2                                     | 2          | 2                    | 7           | 7   | 7                                                                                           |   |  |
| 1-3C      | 48  | Screening    | 1                                           | ✓                     | ✓                 | ✓                       | ✓                   |                                       | 2                            | 1                    | 2                    | 1              | 1                                   | 1  | 2                                     | 2          | 2                    | 7           | 7   | 7                                                                                           |   |  |
| 2-15C     | 67  | Screening    | 1                                           | ✓                     | ✓                 | ✓                       | ✓                   |                                       | 2                            | 3                    | 4                    | 1              | 1                                   | 2  | 2                                     | 2          | 7                    | 7           | 7   | 7                                                                                           |   |  |
| 2-4C      | 56  | Screening    | Screening                                   | 1                     | ✓                 | ✓                       | ✓                   |                                       | 3                            | 4                    | 6                    | 1              | 1                                   | 1  | 2                                     | 2          | 7                    | 7           | 7   | 7                                                                                           |   |  |
| 3-18C     | 65  | Screening    | Screening                                   | 1                     | ✓                 | ✓                       | ✓                   |                                       | 2                            | 1                    | 2                    | 1              | 1                                   | 2  | 2                                     | 1          | 1                    | 1           | 2   | 2                                                                                           | 2 |  |
| 3-2C      | 54  | Screening    | 1                                           | ✓                     | ✓                 | ✓                       | ✓                   |                                       | 3                            | 2                    | 4                    | 1              | 1                                   | 2  | 2                                     | 1          | 1                    | 1           | 2   | 2                                                                                           | 2 |  |
| 3-5C      | 50  | Screening    | Screening                                   | 1                     | ✓                 | ✓                       | ✓                   |                                       | 2                            | 2                    | 3                    | 1              | 1                                   | 1  | 2                                     | 2          | 7                    | 7           | 7   | 7                                                                                           |   |  |
| 3-9C      | 49  | Screening    | 1                                           | ✓                     | ✓                 | ✓                       | ✓                   |                                       | 2                            | 2                    | 3                    | 1              | 1                                   | 1  | 2                                     | 2          | 7                    | 7           | 7   | 7                                                                                           |   |  |
| 4-23C     | 62  | Screening    | Screening                                   | 1                     | ✓                 | ✓                       | ✓                   |                                       | 2                            | 3                    | 4                    | 1              | 1                                   | 1  | 2                                     | 2          | 7                    | 7           | 7   | 7                                                                                           |   |  |
| 4-29C     | 34  | Screening    | 1                                           | ✓                     | ✓                 | ✓                       | ✓                   |                                       | 4                            | 4                    | 6                    | 1              | 2                                   | 1  | 2                                     | 1          | 7                    | 7           | 7   | 7                                                                                           |   |  |
| 5-8C      | 65  | Screening    | Validation                                  | 1                     | ✓                 | ✓                       | ✓                   |                                       | 1                            | 2                    | 2                    | 1              | 1                                   | 1  | 2                                     | 2          | 7                    | 7           | 7   | 7                                                                                           |   |  |
| 8-17C     | 54  | Screening    | Screening                                   | 1                     | ✓                 | ✓                       | ✓                   |                                       | 2                            | 1                    | 2                    | 1              | 1                                   | 2  | 2                                     | 2          | 7                    | 7           | 7   | 7                                                                                           |   |  |
| 8-21C     | 58  | Screening    | Screening                                   | 1                     | ✓                 | ✓                       | ✓                   |                                       | 4                            | 2                    | 5                    | 3              | 1                                   | 1  | 1                                     | 1          | 7                    | 7           | 7   | 7                                                                                           |   |  |
| 8-36C     | 60  | Screening    | Validation                                  | 1                     | ✓                 | ✓                       | ✓                   |                                       | 2                            | 1                    | 2                    | 1              | 1                                   | 1  | 2                                     | 2          | 7                    | 7           | 7   | 7                                                                                           |   |  |
| 8-40C     | 56  | Screening    | Validation                                  | 1                     | ✓                 | ✓                       | ✓                   |                                       | 2                            | 2                    | 3                    | 1              | 1                                   | 2  | 2                                     | 2          | 7                    | 7           | 7   | 7                                                                                           |   |  |
| 9-24C     | 68  | Screening    | Screening                                   | 1                     | ✓                 | ✓                       | ✓                   |                                       | 2                            | 4                    | 6                    | 1              | 1                                   | 2  | 2                                     | 2          | 7                    | 7           | 7   | 7                                                                                           |   |  |
| 1-146C    | 64  | Validation   | Validation                                  | 0                     | ✓                 | ✓                       | ✓                   |                                       | 2                            | 3                    | 4                    | 1              | 1                                   | 2  | 2                                     | 2          | 6                    | 6           | 6   | 6                                                                                           |   |  |
| 1-33C     | 58  | Validation   | Screening                                   | 0                     | ✓                 | ✓                       | ✓                   |                                       | 2                            | 1                    | 2                    | 1              | 2                                   | 1  | 1                                     | 1          | 3                    | 3           | 3   | 3                                                                                           |   |  |
| 1-59C     | 56  | Validation   | 0                                           | ✓                     | ✓                 | ✓                       | ✓                   |                                       | 2                            | 1                    | 2                    | 1              | 2                                   | 1  | 1                                     | 1          | 4                    | 4           | 4   | 4                                                                                           |   |  |
| 10-64C    | 64  | Validation   | Validation                                  | 0                     | ✓                 | ✓                       | ✓                   |                                       | 2                            | 1                    | 2                    | 1              | 2                                   | 2  | 1                                     | 1          | 1                    | 1           | 4   | 4                                                                                           |   |  |
| 10-69C    | 72  | Validation   | Validation                                  | 0                     | ✓                 | ✓                       | ✓                   |                                       | 2                            | 1                    | 2                    | 2              | 2                                   | 2  | 1                                     | 1          | 1                    | 1           | 2   | 2                                                                                           |   |  |
| 11-74C    | 62  | Validation   | Validation                                  | 0                     | ✓                 | ✓                       | ✓                   |                                       | 2                            | 1                    | 2                    | 1              | 2                                   | 1  | 2                                     | 1          | 2                    | 3           | 3   | 3                                                                                           |   |  |
| 11-77C    | 59  | Validation   | Validation                                  | 0                     | ✓                 | ✓                       | ✓                   |                                       | 2                            | 2                    | 3                    | 1              | 1                                   | 1  | 1                                     | 1          | 1                    | 1           | 4   | 4                                                                                           |   |  |
| 11-94C    | 59  | Validation   | Validation                                  | 0                     | ✓                 | ✓                       | ✓                   |                                       | 4                            | 2                    | 5                    | 1              | 1                                   | 1  | 1                                     | 1          | 2                    | 5           | 5   | 5                                                                                           |   |  |
| 12-113C   | 62  | Validation   | Validation                                  | 0                     | ✓                 | ✓                       | ✓                   |                                       | 3                            | 2                    | 4                    | 1              | 2                                   | 2  | 2                                     | 2          | 6                    | 6           | 6   | 6                                                                                           |   |  |
| 12-143C   | 62  | Validation   | 0                                           | ✓                     | ✓                 | ✓                       | ✓                   |                                       | 2                            | 2                    | 3                    | 1              | 2                                   | 2  | 2                                     | 2          | 6                    | 6           | 6   | 6                                                                                           |   |  |
| 13-124C   | 57  | Validation   | Validation                                  | 0                     | ✓                 | ✓                       | ✓                   |                                       | 2                            | 2                    | 3                    | 1              | 1                                   | 2  | 2                                     | 2          | 6                    | 6           | 6   | 6                                                                                           |   |  |
| 13-140C   | 42  | Validation   | Validation                                  | 0                     | ✓                 | ✓                       | ✓                   |                                       | 2                            | 2                    | 3                    | 1              | 1                                   | 2  | 2                                     | 2          | 5                    | 5           | 5   | 5                                                                                           |   |  |
| 2-37C     | 72  | Validation   | 0                                           | ✓                     | ✓                 | ✓                       | ✓                   |                                       | 4                            | 1                    | 5                    | 1              | 1                                   | 2  | 2                                     | 2          | 6                    | 6           | 6   | 6                                                                                           |   |  |
| 3-111C    | 61  | Validation   | Validation                                  | 0                     | ✓                 | ✓                       | ✓                   |                                       | 2                            | 1                    | 2                    | 1              | 1                                   | 2  | 2                                     | 1          | 1                    | 1           | 2   | 2                                                                                           | 2 |  |
| 3-129C    | 58  | Validation   | Validation                                  | 0                     | ✓                 | ✓                       | ✓                   |                                       | 2                            | 1                    | 2                    | 1              | 2                                   | 1  | 1                                     | 1          | 1                    | 1           | 4   | 4                                                                                           | 4 |  |
| 3-93C     | 29  | Validation   | Validation                                  | 0                     | ✓                 | ✓                       | ✓                   |                                       | 3                            | 3                    | 4                    | 1              | 1                                   | 2  | 2                                     | 2          | 4                    | 4           | 4   | 4                                                                                           |   |  |
| 4-16C     | 59  | Validation   | 0                                           | ✓                     | ✓                 | ✓                       | ✓                   |                                       | 2                            | 2                    | 3                    | 1              | 1                                   | 1  | 1                                     | 2          | 2                    | 4           | 4   | 4                                                                                           | 4 |  |
| 4-30C     | 63  | Validation   | Screening                                   | 0                     | ✓                 | ✓                       | ✓                   |                                       | 2                            | 1                    | 2                    | 1              | 1                                   | 1  | 2                                     | 2          | 4                    | 4           | 4   | 4                                                                                           |   |  |
| 5-28C     | 56  | Validation   | Screening                                   | 0                     | ✓                 | ✓                       | ✓                   |                                       | 2                            | 2                    | 3                    | 1              | 2                                   | 2  | 2                                     | 2          | 4                    | 4           | 4   | 4                                                                                           |   |  |
| 6-11C     | 63  | Validation   | Screening                                   | 0                     | ✓                 | ✓                       | ✓                   |                                       | 2                            | 2                    | 3                    | 2              | 1                                   | 1  | 1                                     | 1          | 2                    | 2           | 2   | 2                                                                                           | 2 |  |
| 6-92C     | 54  | Validation   | Validation                                  | 0                     | ✓                 | ✓                       | ✓                   |                                       | 3                            | 2                    | 4                    | 1              | 1                                   | 1  | 1                                     | 1          | 1                    | 1           | 4   | 4                                                                                           | 4 |  |
| 7-75C     | 72  | Validation   | Validation                                  | 0                     | ✓                 | ✓                       | ✓                   |                                       | 3                            | 2                    | 4                    | 1              | 1                                   | 1  | 2                                     | 2          | 3                    | 3           | 3   | 3                                                                                           | 3 |  |
| 7-86C     | 45  | Validation   | Validation                                  | 0                     | ✓                 | ✓                       | ✓                   |                                       | 2                            | 1                    | 2                    | 1              | 1                                   | 1  | 1                                     | 1          | 1                    | 1           | 1   | 1                                                                                           | 1 |  |
| 8-141C    | 48  | Validation   | Validation                                  | 0                     | ✓                 | ✓                       | ✓                   |                                       | 2                            | 2                    | 3                    | 1              | 2                                   | 2  | 2                                     | 2          | 2                    | 2           | 2   | 2                                                                                           | 2 |  |
| 8-158C    | 39  | Validation   | 0                                           | ✓                     | ✓                 | ✓                       | ✓                   |                                       | 2                            | 2                    | 3                    | 1              | 1                                   | 1  | 1                                     | 1          | 1                    | 1           | 6   | 6                                                                                           | 6 |  |
| 8-47C     | 61  | Validation   | Validation                                  | 0                     | ✓                 | ✓                       | ✓                   |                                       | 2                            | 2                    | 3                    | 1              | 2                                   | 1  | 1                                     | 1          | 1                    | 1           | 4   | 4                                                                                           | 4 |  |
| 8-68C     | 43  | Validation   | Validation                                  | 0                     | ✓                 | ✓                       | ✓                   |                                       | 2                            | 2                    | 3                    | 1              | 2                                   | 1  | 1                                     | 1          | 1                    | 1           | 5   | 5                                                                                           | 5 |  |
| 8-90C     | 39  | Validation   | Validation                                  | 0                     | ✓                 | ✓                       | ✓                   |                                       | 2                            | 1                    | 2                    | 1              | 1                                   | 1  | 1                                     | 1          | 1                    | 1           | 4   | 4                                                                                           | 4 |  |
| 8-95C     | 63  | Validation   | Validation                                  | 0                     | ✓                 | ✓                       | ✓                   |                                       | 2                            | 2                    | 3                    | 1              | 1                                   | 2  | 2                                     | 2          | 5                    | 5           | 5   | 5                                                                                           | 5 |  |
| 9-144C    | 50  | Validation   | 0                                           | ✓                     | ✓                 | ✓                       | ✓                   |                                       | 2                            | 3                    | 4                    | 1              | 2                                   | 1  | 2                                     | 1          | 2                    | 6           | 6   | 6                                                                                           | 6 |  |
| 1-106C    | 65  | Validation   | 1                                           | ✓                     | ✓                 | ✓                       | ✓                   |                                       | 2                            | 1                    | 2                    | 1              | 2                                   | 1  | 1                                     | 1          | 1                    | 7           | 7   | 7                                                                                           | 7 |  |
| 1-107C    | 58  | Validation   | Validation                                  | 1                     | ✓                 | ✓                       | ✓                   |                                       | 2                            | 2                    | 3                    | 1              | 1                                   | 2  | 2                                     | 2          | 7                    | 7           | 7   | 7                                                                                           | 7 |  |
| 1-156C    | 61  | Validation   | Validation                                  | 1                     | ✓                 | ✓                       | ✓                   |                                       | 2                            | 2                    | 3                    | 1              | 1                                   | 2  | 2                                     | 2          | 7                    | 7           | 7   | 7                                                                                           | 7 |  |
| 1-169C    | 35  | Validation   | Validation                                  | 1                     | ✓                 | ✓                       | ✓                   |                                       | 3                            | 4                    | 6                    | 1              | 1                                   | 2  | 2                                     | 2          | 7                    | 7           | 7   | 7                                                                                           | 7 |  |
| 11-32C    | 64  | Validation   | Screening                                   | 1                     | ✓                 | ✓                       | ✓                   |                                       | 2                            | 2                    | 3                    | 1              | 1                                   | 2  | 2                                     | 1          | 1                    | 1           | 2   | 2                                                                                           | 2 |  |
| 11-91C    | 55  | Validation   | Validation                                  | 1                     | ✓                 | ✓                       | ✓                   |                                       | 3                            | 2                    | 4                    | 1              | 1                                   | 1  | 2                                     | 2          | 7                    | 7           | 7   | 7                                                                                           | 7 |  |
| 12-35C    | 50  | Validation   | Validation                                  | 1                     | ✓                 | ✓                       | ✓                   |                                       | 2                            | 2                    | 3                    | 1              | 1                                   | 1  | 1                                     | 2          | 7                    | 7           | 7   | 7                                                                                           | 7 |  |
| 13-152C   | 46  | Validation   | Validation                                  | 1                     | ✓                 | ✓                       | ✓                   |                                       | 2                            | 2                    | 3                    | 1              | 1                                   | 1  | 2                                     | 2          | 7                    | 7           | 7   | 7                                                                                           | 7 |  |
| 3-130C    | 41  | Validation   | Validation                                  | 1                     | ✓                 | ✓                       | ✓                   |                                       | 2                            | 2                    | 3                    | 1              | 1                                   | 2  | 2                                     | 2          | 7                    | 7           | 7   | 7                                                                                           | 7 |  |
| 3-26C     | 49  | Validation   | Screening                                   | 1                     | ✓                 | ✓                       | ✓                   |                                       | 2                            | 1                    | 2                    | 1              | 1                                   | 1  | 1                                     | 1          | 1                    | 1           | 7   | 7                                                                                           | 7 |  |
| 4-138C    | 57  | Validation   | 1                                           | ✓                     | ✓                 | ✓                       | ✓                   |                                       | 2                            | 2                    | 3                    | 1              | 1                                   | 1  | 1                                     | 2          | 7                    | 7           | 7   | 7                                                                                           | 7 |  |
| 4-139C    | 61  | Validation   | 1                                           | ✓                     | ✓                 | ✓                       | ✓                   |                                       | 3                            | 2                    | 4                    | 1              | 1                                   | 1  | 2                                     | 2          | 7                    | 7           | 7   | 7                                                                                           | 7 |  |
| 8-136C    | 55  | Validation   | 0                                           | ✓                     | ✓                 | ✓                       | ✓                   |                                       | 4                            | 2                    | 5                    | 2              | 1                                   | 2  | 2                                     | 1          | 7                    | 7           | 7   | 7                                                                                           | 7 |  |
| 8-20C     | 60  | Validation   | Screening                                   | 1                     | ✓                 | ✓                       | ✓                   |                                       | 2                            | 2                    | 3                    | 1              | 1                                   | 2  | 2                                     | 1          | 7                    | 7           | 7   | 7                                                                                           | 7 |  |
| 8-82C     | 63  | Validation   | Validation                                  | 1                     | ✓                 | ✓                       | ✓                   |                                       | 2                            | 1                    | 2                    | 1              | 1                                   | 1  | 1                                     | 1          | 1                    | 1           | 7   | 7                                                                                           | 7 |  |
| 9-52C     | 67  | Validation   | 1                                           | ✓                     | ✓                 | ✓                       | ✓                   |                                       | 3                            | 2                    | 4                    | 3              | 2                                   | 2  | 2                                     | 2          | 7                    | 7           | 7   | 7                                                                                           | 7 |  |
| 9-89C     | 57  | Validation   | Validation                                  | 1                     | ✓                 | ✓                       | ✓                   |                                       | 2                            | 1                    | 2                    | 1              | 1                                   | 2  | 2                                     | 2          | 7                    | 7           | 7   | 7                                                                                           | 7 |  |
| 10-167C   | 33  | Revalidation | 0                                           | ✓                     | ✓                 | ✓                       | ✓                   |                                       | 2                            | 1                    | 2                    | 1              | 1                                   | 1  | 1                                     | 1          | 1                    | 1           | 4   | 4                                                                                           | 4 |  |
| 10-229C   | 56  | Revalidation | 0                                           | ✓                     | ✓                 | ✓                       | ✓                   |                                       | 2                            | 2                    | 3                    | 1              | 2                                   | 1  | 1                                     | 1          | 1                    | 1           | 1   | 1                                                                                           | 1 |  |
| 10-31C    | 69  | Revalidation | 0                                           | ✓                     | ✓                 | ✓                       | ✓                   |                                       | 2                            | 1                    | 2                    | 2              | 1                                   | 1  | 1                                     | 2          | 4                    | 4           | 4   | 4                                                                                           | 4 |  |
| 10-51C    | 68  | Revalidation | 0                                           | ✓                     | ✓                 | ✓                       | ✓                   |                                       |                              |                      |                      |                |                                     |    |                                       |            |                      |             |     |                                                                                             |   |  |

**Supplementary Table 2 List of primers**

| Gene symbol                | Analysis           | Forward primer (5'→3')                 | Reverse primer (5'→3')        | Length (bp) |
|----------------------------|--------------------|----------------------------------------|-------------------------------|-------------|
| <i>PLCB4</i>               | real-time RT-PCR   | CATGCAAAGGAACACAGTACCA                 | CTAGGATTTTCTCATGAGTCGACTT     | 103         |
| <i>TGFB2</i>               | real-time RT-PCR   | GAAGAATGCTTCCAATTTGGTG                 | GGACTTGAGAATCTGATATAGCTC      | 109         |
| <i>GPR110</i>              | real-time RT-PCR   | ACTTCGTTGTGGTGCTGCTAGT                 | AGCAGAGGGGTGAGAATGAGGA        | 127         |
| <i>MMP13</i>               | real-time RT-PCR   | TCCTGTTCTCAGGAAACCAG                   | AAACTGTATGGGTCCGTTGA          | 167         |
| <i>C6orf203</i>            | real-time RT-PCR   | TGAACCTAGGCTGAATGAGG                   | TCCGCATAACTGTCTCTGTTC         | 119         |
| <i>MMP1</i>                | real-time RT-PCR   | CCAAAATGATAGCACATGACTTTCC              | CTGAGAGTCAAAAATTCTCTTCGT      | 140         |
| <i>GUCY1A3</i>             | real-time RT-PCR   | AATTTGAGTCCTGCAGTGACC                  | TCGAGGGGTAAACACGAAAC          | 95          |
| <i>TUBA4A</i>              | real-time RT-PCR   | CAACCAGATGGTAAAGTGTGATCC               | CAATGGCAGCGTTGACATCC          | 101         |
| <i>PMEPA1</i>              | real-time RT-PCR   | GCACAGTGTCCAGGCAACGGA                  | TCTCGTGTGCAGGTACGGA           | 141         |
| <i>FBLN1</i>               | real-time RT-PCR   | GAGTGGCTTTATACAAGATGCTC                | CTGTGTTGATGCATGTATGCC         | 101         |
| <i>MRPL43</i>              | real-time RT-PCR   | GAGGAGAGCATCCACTGCAA                   | CTAGGGTTGTCCGGTGTGGAA         | 119         |
| <i>PDE5A</i>               | real-time RT-PCR   | ACAAGAGAGCTACAGTCGTTAG                 | GTGCTGTTCCAGATCAGAC           | 109         |
| <i>HSD17B4</i>             | real-time RT-PCR   | AGGAAATAGGACGCCCTAA                    | CCTTGGTACACTTTCCAGAACCA       | 148         |
| <i>GAPDH</i>               | real-time RT-PCR   | GGTCGGAGTCAACGGATTT                    | TGATGGCAACAATATCCACTT         | 86          |
| <i>HSD17B4 V1</i>          | real-time RT-PCR   | ATGGTTATTCTTGGGCACCG                   | GATCTTCTCCATAGGGTTATTGC       | 159         |
| <i>HSD17B4 V2</i>          | real-time RT-PCR   | AAATCGGCAAGTCACTGACCCT                 | CCAAATCATTCAACAACCTAACGC      | 240         |
| <i>HSD17B4 V3</i>          | real-time RT-PCR   | GCAAGTCACTGACCCTCGT                    | CCAAATCATTCACTGCCC            | 180         |
| <i>HSD17B4 V4</i>          | real-time RT-PCR   | TCGTCCCGCCCCGCCAT                      | CTTCTCCATAGGGTTATTGCATAG      | 241         |
| <i>HSD17B4 V5</i>          | real-time RT-PCR   | GGTCTCTCAAGCAGGATT                     | GTCATAATAATCTTCTGTTTCTT       | 393         |
| <i>HSD17B4 V6 (+V2+V5)</i> | real-time RT-PCR   | AGCGGCTCTGCTTGTTCTGTGT                 | CCAAATCATTCAACAACCTAACGC      | 168         |
| <i>HSD17B4</i>             | Bisulfite-pyro-seq | GGTGAGTTTATGAATAAGGTTTGTA              | Bio-CACAAATCCTAACAACTCCCATTAC | 268         |
| <i>HSD17B4</i>             | Bisulfite-pyro-seq | TAAAGATATATATAAGAATAAGTAG (sequencing) |                               |             |
| <i>C1orf51</i>             | Bisulfite-pyro-seq | Hs_CG21831898_02_PM PyroMark CpG assay |                               |             |
| <i>PTPN18</i>              | Bisulfite-pyro-seq | Hs_CG26797073_01_PM PyroMark CpG assay |                               |             |
| <i>LOC441046</i>           | Bisulfite-pyro-seq | Hs_CG18925923_01_PM PyroMark CpG assay |                               |             |
| <i>ZNF354C</i>             | Bisulfite-pyro-seq | Hs_CG12623648_03_PM PyroMark CpG assay |                               |             |
| <i>TTC18</i>               | Bisulfite-pyro-seq | Hs_CG08496452_02_PM PyroMark CpG assay |                               |             |
| <i>KLC2</i>                | Bisulfite-pyro-seq | Hs_CG18046087_02_PM PyroMark CpG assay |                               |             |
| <i>IVD</i>                 | Bisulfite-pyro-seq | Hs_CG11934304_02_PM PyroMark CpG assay |                               |             |
| <i>PISD</i>                | Bisulfite-pyro-seq | Hs_CG26448406_02_PM PyroMark CpG assay |                               |             |



Supplementary Table 4 List of candidate genes isolated by expression micorarray

| Probe Name    | Chromosome | Gene            | Expression level (intensity)<br>in samples with |         | P-value | Fold (log2) | Abundant expression |
|---------------|------------|-----------------|-------------------------------------------------|---------|---------|-------------|---------------------|
|               |            |                 | pCR                                             | non-pCR |         |             |                     |
| A_33_P3260634 | chr20      | <i>PLCB4</i>    | 1.41                                            | 0.06    | 0.0002  | 4.5         | ✓                   |
| A_24_P402438  | chr1       | <i>TGFB2</i>    | 0.87                                            | 0.04    | 0.00029 | 4.4         | ✓                   |
| A_23_P214267  | chr6       | <i>GPR110</i>   | 0.54                                            | 0.03    | 0.00034 | 4.3         | ✓                   |
| A_33_P3221203 | chr11      | <i>MMP13</i>    | 2.00                                            | 0.14    | 0.00057 | 3.8         | ✓                   |
| A_23_P259333  | chr6       | <i>C6orf203</i> | 2.14                                            | 0.19    | 0.00034 | 3.5         | ✓                   |
| A_23_P1691    | chr11      | <i>MMP1</i>     | 5.66                                            | 0.66    | 0.00033 | 3.1         | ✓                   |
| A_23_P69573   | chr4       | <i>GUCY1A3</i>  | 2.30                                            | 0.29    | 0.00031 | 3.0         | ✓                   |
| A_23_P154065  | chr2       | <i>TUBA4A</i>   | 22.63                                           | 4.92    | 0.00098 | 2.2         | ✓                   |
| A_33_P3403867 | chr20      | <i>PMEPA1</i>   | 5.28                                            | 1.15    | 0.00084 | 2.2         | ✓                   |
| A_33_P3249872 | chr22      | <i>FBLN1</i>    | 11.31                                           | 2.64    | 0.00003 | 2.1         | ✓                   |
| A_33_P3263824 | chr10      | <i>MRPL43</i>   | 0.57                                            | 2.46    | 0.00036 | -2.2        | ✓                   |
| A_23_P68121   | chr2       | <i>PSD4</i>     | 0.03                                            | 0.14    | 0.00025 | -2.3        |                     |
| A_33_P3378514 | chr4       | <i>PDE5A</i>    | 0.57                                            | 4.00    | 0.00023 | -2.7        | ✓                   |
| A_33_P3374289 | chr10      | <i>C10orf82</i> | 0.05                                            | 0.41    | 0.00009 | -3.2        |                     |
| A_23_P69699   | chr4       | <i>NPY1R</i>    | 0.01                                            | 0.15    | 0.00088 | -3.8        |                     |

**Supplementary Table 5 List of candidate genes isolated by DNA methylation beadarray**

| TargetID   | Chromosome | Gene             | UCSC RefGene Group | Relation to a CpG Island | Sensitivity | Specificity | Accuracy | Pyrosequencing primer |
|------------|------------|------------------|--------------------|--------------------------|-------------|-------------|----------|-----------------------|
| cg21831898 | 1          | <i>C1orf51</i>   | TSS1500            | Island                   | 0.38        | 0.95        | 0.74     | Designed              |
| cg26797073 | 2          | <i>PTPN18</i>    | Body               | Island                   | 0.31        | 0.95        | 0.71     | Designed              |
| cg18925923 | 4          | <i>LOC441046</i> | TSS1500            | N Shore                  | 0.15        | 1.00        | 0.68     | Designed              |
| cg15896301 | 5          | <i>HSD17B4</i>   | 1stExon            | Island                   | 0.62        | 0.90        | 0.79     | Designed              |
| cg12623648 | 5          | <i>ZNF354C</i>   | TSS1500            | Island                   | 0.15        | 1.00        | 0.68     | Failed                |
| cg08496452 | 10         | <i>TTC18</i>     | TSS200             | Island                   | 0.15        | 1.00        | 0.68     | Designed              |
| cg11934304 | 15         | <i>IVD</i>       | Body               | Island                   | 0.38        | 0.90        | 0.71     | Designed              |
| cg26448406 | 22         | <i>PISD</i>      | 5'UTR              | Island                   | 0.31        | 0.95        | 0.71     | Failed                |

**Supplementary Table 6 Detailed responses by *HSD17B4* methylation and ER status**

| <i>HSD17B4</i> |          | Pathological response |    |    |    |    |       |     | Total | pCR  |
|----------------|----------|-----------------------|----|----|----|----|-------|-----|-------|------|
| methylation    | ER       | 0                     | 1a | 1b | 2a | 2b | rDCIS | pCR |       | rate |
| High           | Negative | 0                     | 0  | 1  | 2  | 2  | 1     | 24  | 30    | 80%  |
| High           | Positive | 0                     | 3  | 0  | 1  | 0  | 0     | 6   | 10    | 60%  |
| Low            | Negative | 0                     | 4  | 2  | 4  | 4  | 10    | 11  | 35    | 31%  |
| Low            | Positive | 1                     | 10 | 12 | 14 | 8  | 6     | 2   | 53    | 4%   |

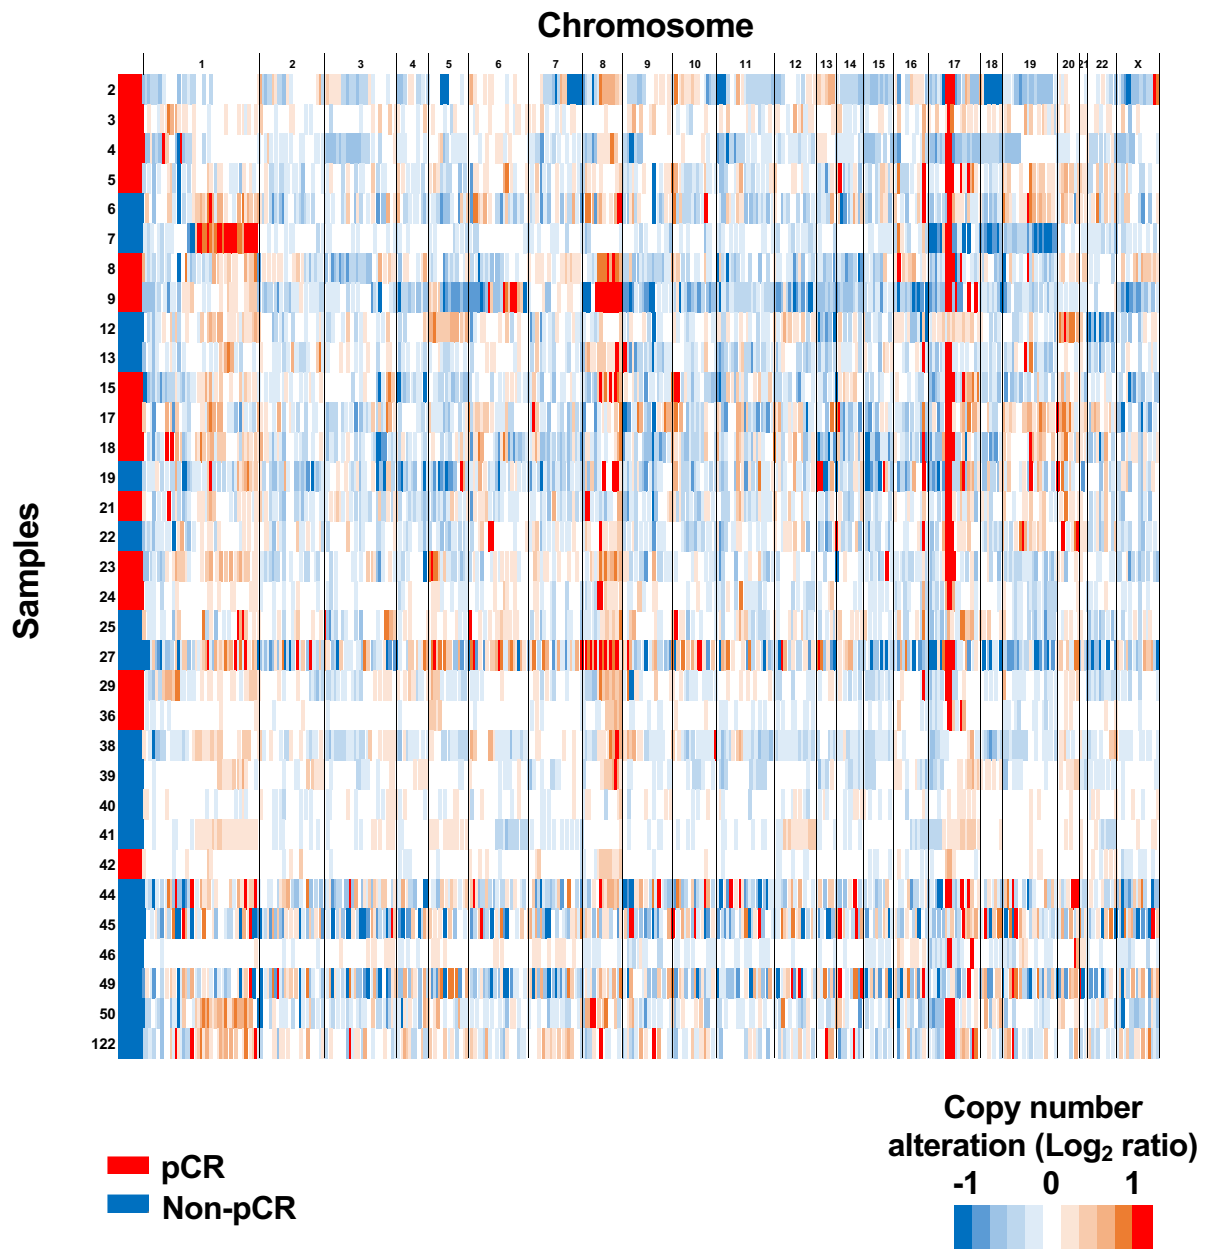

Supplementary Figure 1



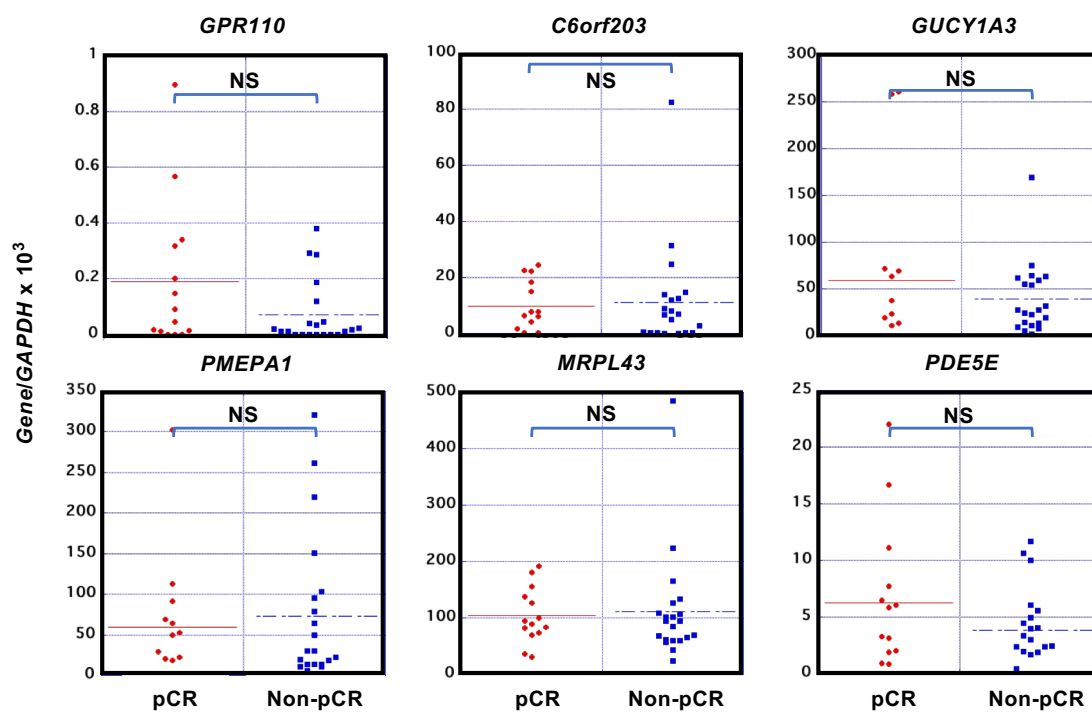

Supplementary Figure 2

**A**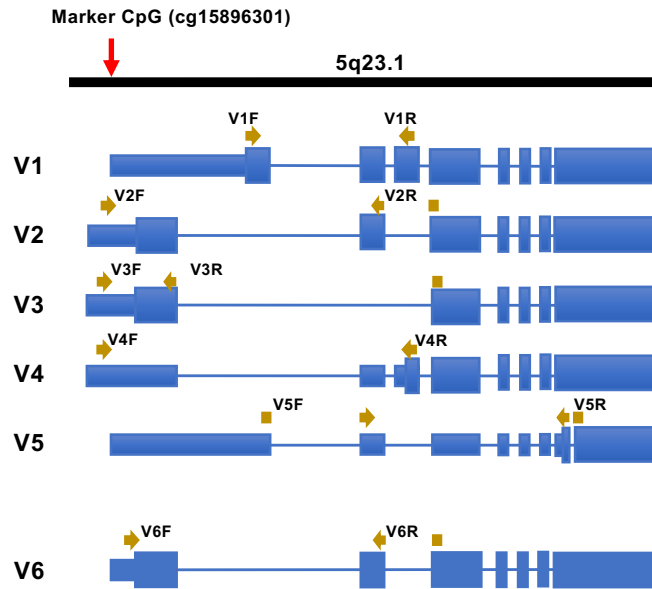**B**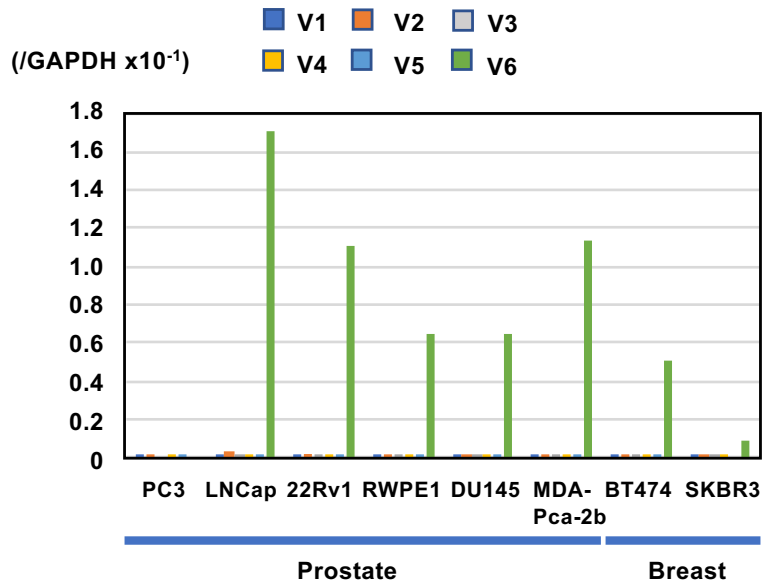

**Our data  
(n = 134)**

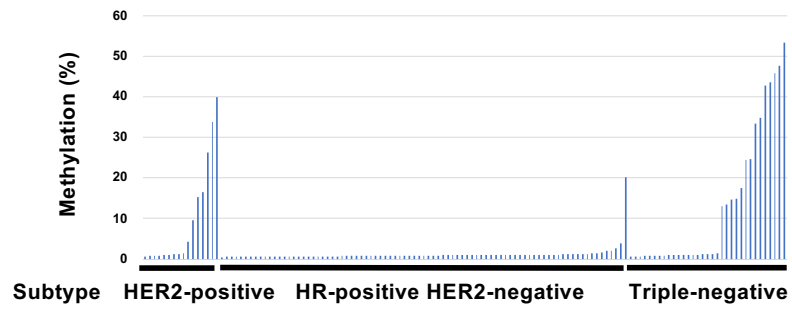

**TCGA data  
(n = 340)**

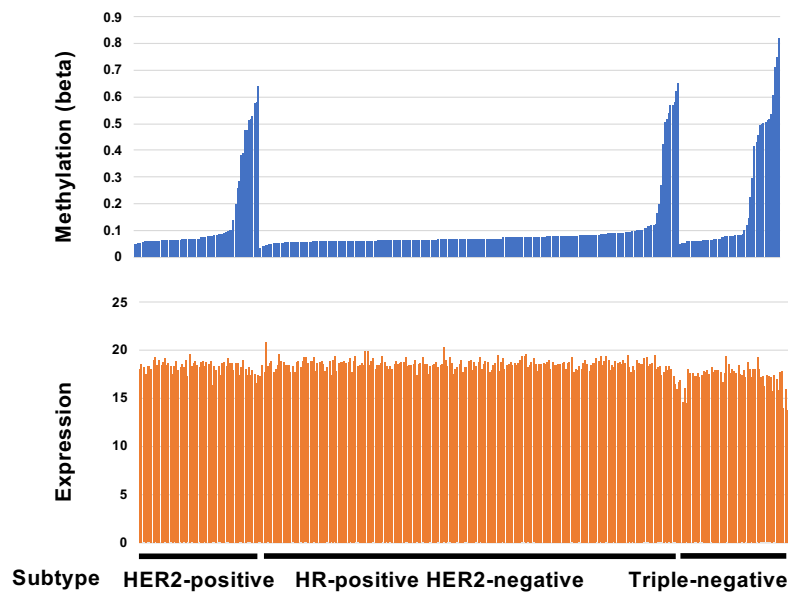

## **Supplementary figure legends**

### ***Supplementary Figure 1. Copy number alterations in the screening set.***

A heatmap of copy number alterations of 409 genes measured by target sequencing in the screening set.

### ***Supplementary Figure 2. Expression analysis of the remaining 6 genes in the validation set.***

Expression levels of the 6 of 12 genes not shown in Figure 2B measured by real-time RT-PCR.

### ***Supplementary Figure 3. Transcriptional variants of HSD17B4***

(A) Exon and intron structures of *HSD17B4* transcriptional variants. V1 to V5 had been reported, and V6 was identified in this study. The primers used for real-time RT-PCR are shown by arrows. (B) Expression of *HSD17B4* transcriptional variants in breast and prostate cancer cell lines.

### ***Supplementary Figure 4. HSD17B4 methylation and expression in breast cancer tissues in the TCGA database***

*HSD17B4* methylation in breast cancer tissues in our specimens (n = 134, upper), *HSD17B4* methylation (middle) and expression (lower) in breast cancer tissues in the TCGA database (n = 340) are shown. Breast cancers with *HSD17B4* methylation were limited to specific subtypes, HER2-positive and triple-negative breast cancers. High *HSD17B4* expression was observed even in breast cancer tissues with its methylation, which was considered due to high *HSD17B4* expression in normal cells contaminating cancer tissues.
